# Supplementary material
Source: PubMed Central journal article supplement (PMC4492807)
Supplement: NIHMS693753-supplement.pdf [file NIHMS693753-supplement.pdf]

# Electronic Supplementary Material

15 pages, 3 tables, 11 figures

## **Metabolomic analysis to define and compare the effects of PAHs and oxygenated PAHs in developing zebrafish**

Marc R. Elie <sup>a</sup>, Jaewoo Choi <sup>b</sup>, Yasmeeen M. Nkrumah-Elie <sup>c</sup>, Gregory D. Gonnerman <sup>a</sup>, J. Fred Stevens<sup>b</sup>,  
Robert L. Tanguay <sup>a,\*</sup>

<sup>a</sup> Department of Environmental and Molecular Toxicology, Environmental Health Sciences Center,  
Oregon State University, Corvallis, OR 97331, United States

<sup>b</sup> College of Pharmacy and Linus Pauling Institute, Oregon State University, Corvallis, OR 97331,  
United States

<sup>c</sup> Department of Pharmaceutical Sciences, Skaggs School of Pharmacy, University of Colorado  
Anschutz Medical Campus, Denver, CO 80045, United States.

\* Corresponding Author: Department of Environmental and Molecular Toxicology, Oregon State  
University, 28645 East HWY 34. Corvallis, OR 97333, USA. Fax: +1 541 737 0497. Tel.: +1 541 737  
6500.

*E-mail Addresses:* [eliem@onid.oregonstate.edu](mailto:eliem@onid.oregonstate.edu) (M. R. Elie), [robert.tanguay@oregonstate.edu](mailto:robert.tanguay@oregonstate.edu) (R.L.  
Tanguay).

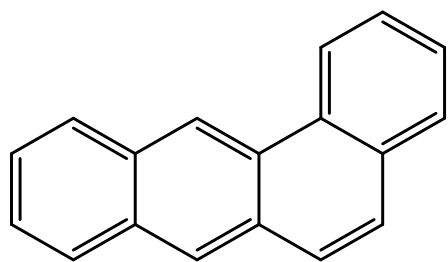

**Benz[a]anthracene (BAA)**

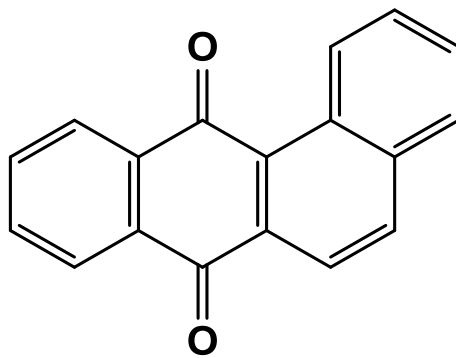

**Benz[a]anthracene-7,12-dione (BAQ)**

**Figure S1.** Structures of selected PAH and oxy-PAH compounds.

**Table S1.** Selected physicochemical properties of selected compounds.

| <b>Compound</b>              | <b>CAS #</b> | <b>Molecular Weight<br/>(g mol<sup>-1</sup>)</b> | <b>Solubility in Water<br/>@ 25°C<br/>(mg L<sup>-1</sup>)</b> | <b>Log K<sub>ow</sub></b> |
|------------------------------|--------------|--------------------------------------------------|---------------------------------------------------------------|---------------------------|
| Benz[a]anthracene            | 56-55-3      | 228.28                                           | 0.0094                                                        | 5.76                      |
| Benz[a]anthracene-7,12-dione | 2498-66-0    | 258.27                                           | 0.29                                                          | 4.40                      |

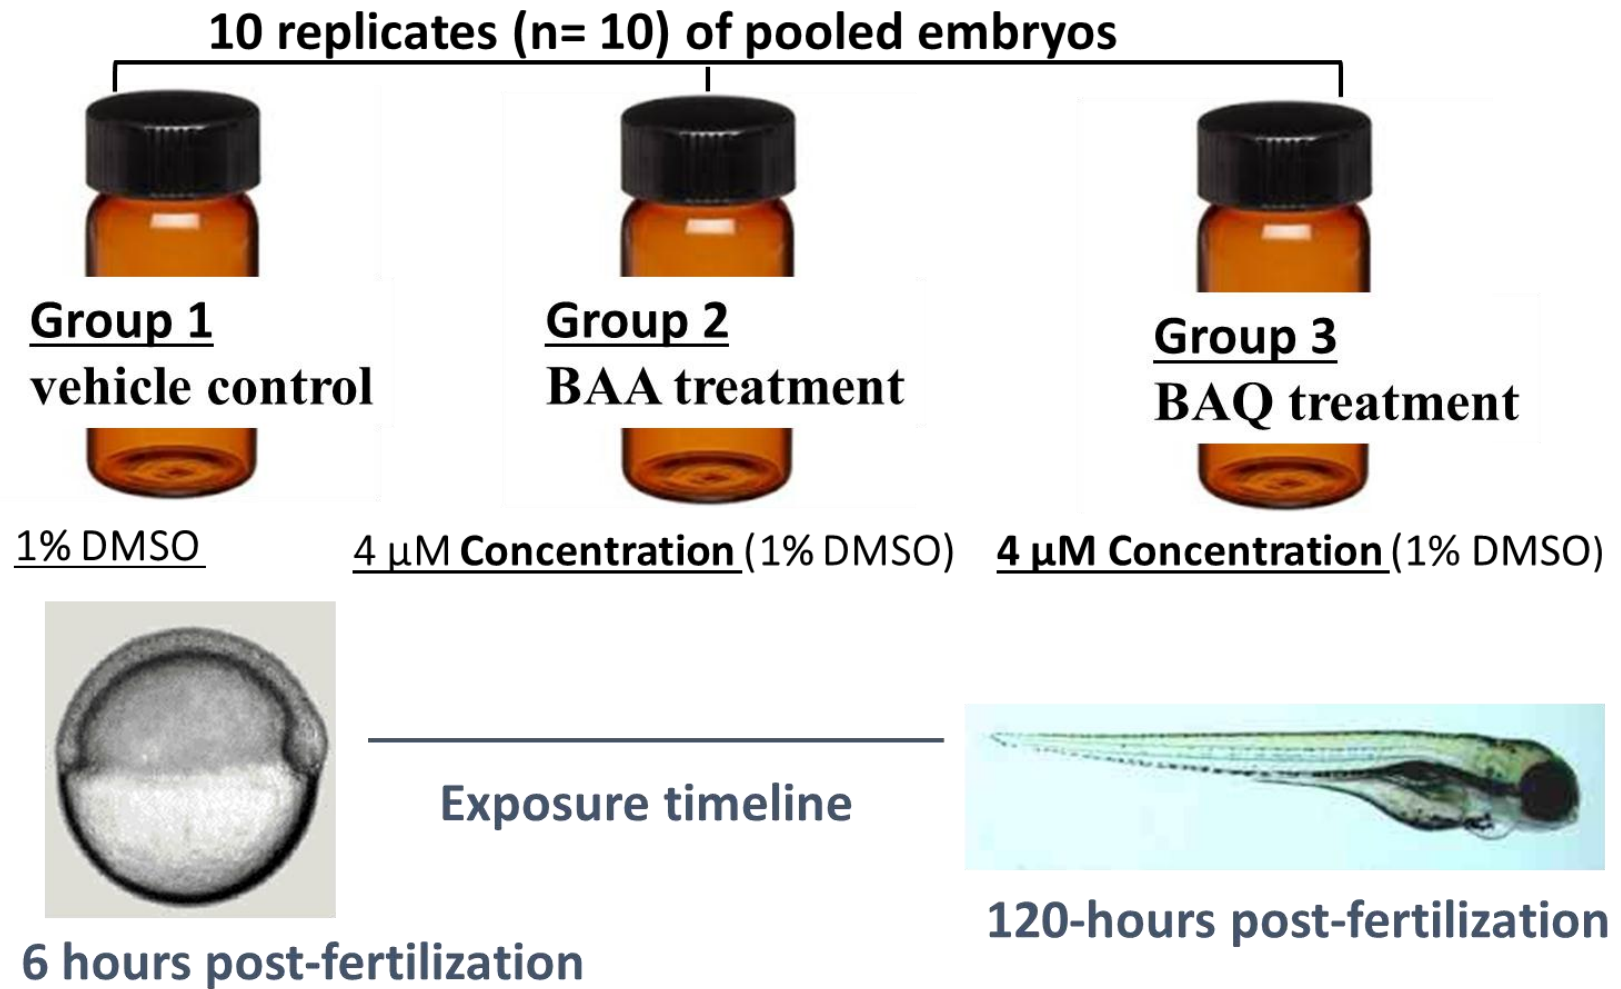

**Figure S2.** Schematic representation of experimental set up

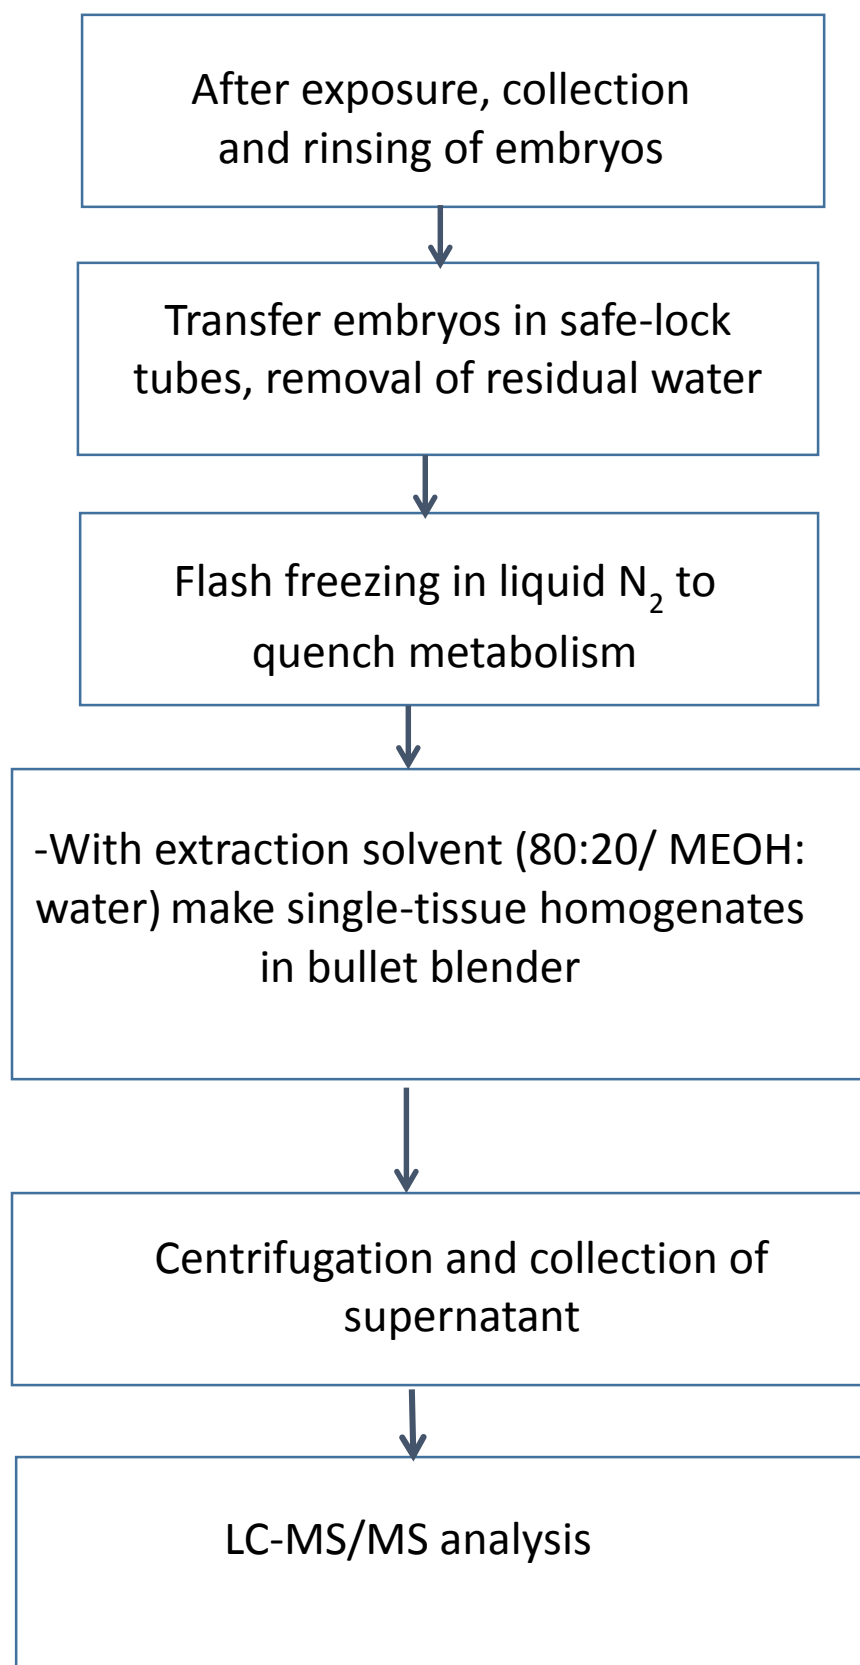

**Figure S3.** Flowchart of the procedure followed for sample preparation, metabolite extractions and analyses.

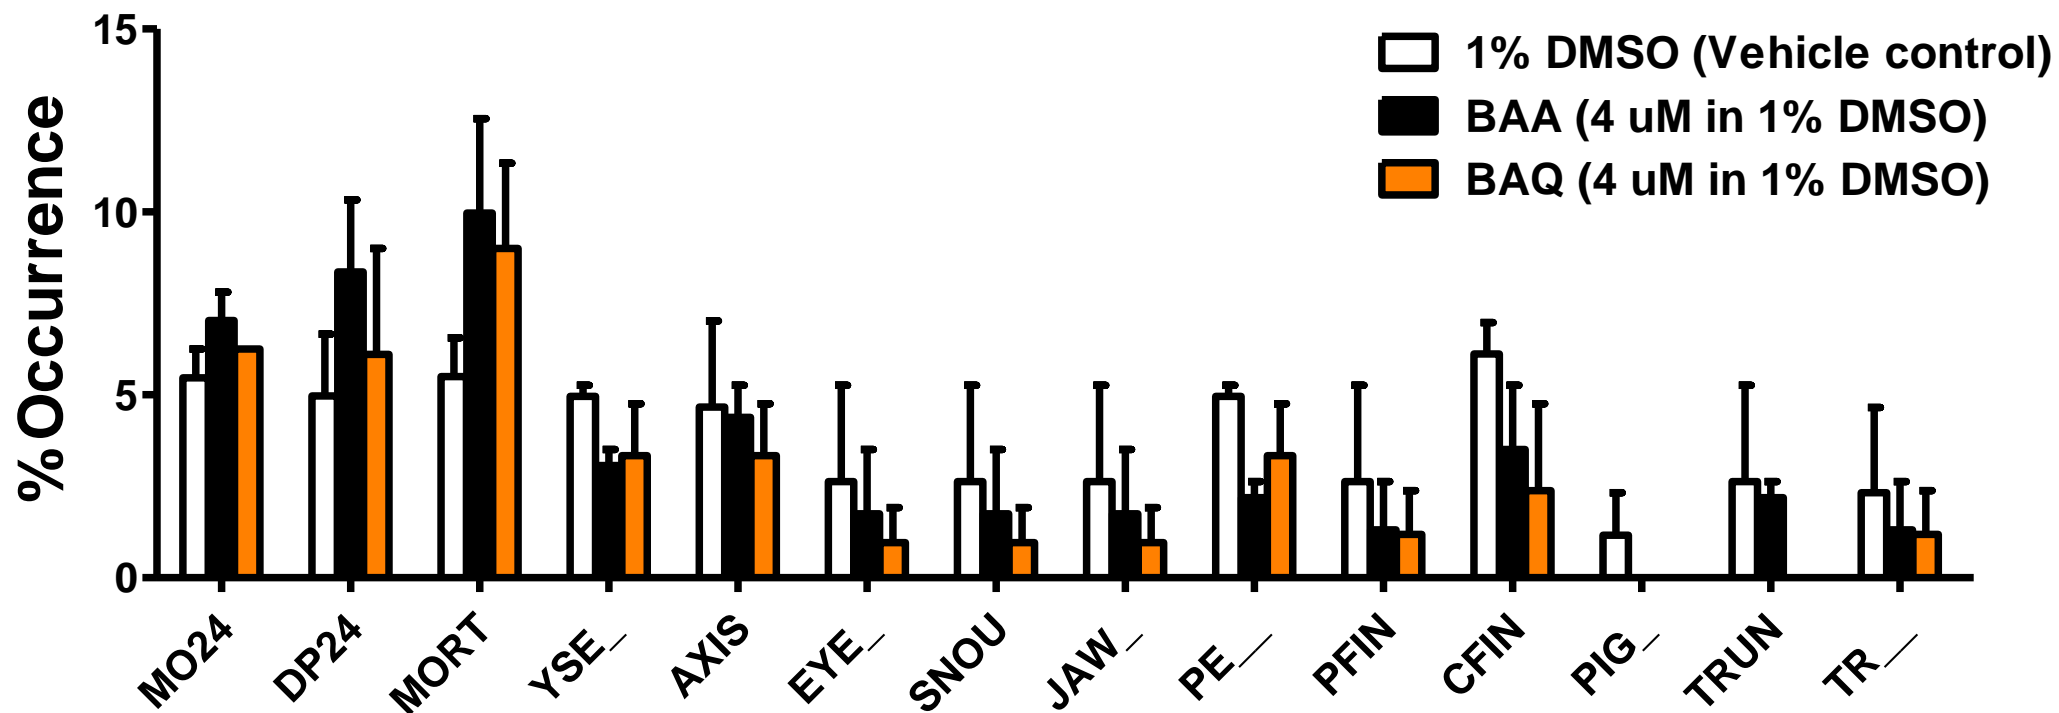

**Figure S4.** Morphological malformations observed in embryos exposed to the vehicle control, 4 μM BAA and 4 μM BAQ. The following toxicological endpoints were assessed: 24 hpf and 120 hpf total mortality (MO24, MORT), developmental progress (DP24), yolk sac edema (YSE), pericardial edema (PE), body axis (AXIS), snout (SNOU), jaw, trunk (TRUN), fin malformations (PFIN, CFIN), pigment (PIG), and touch response (TR). For each exposure treatment, the mean percent occurrences ( $\pm$  standard error) were based on a total of 128 embryos. Embryos were individually exposed to 100 μL of solution in 340 μL wells (96 wells/plate) (BD Biosciences, San Jose, CA). No significant differences ( $p < 0.05$ , two-way ANOVA) were observed among the groups.

**A**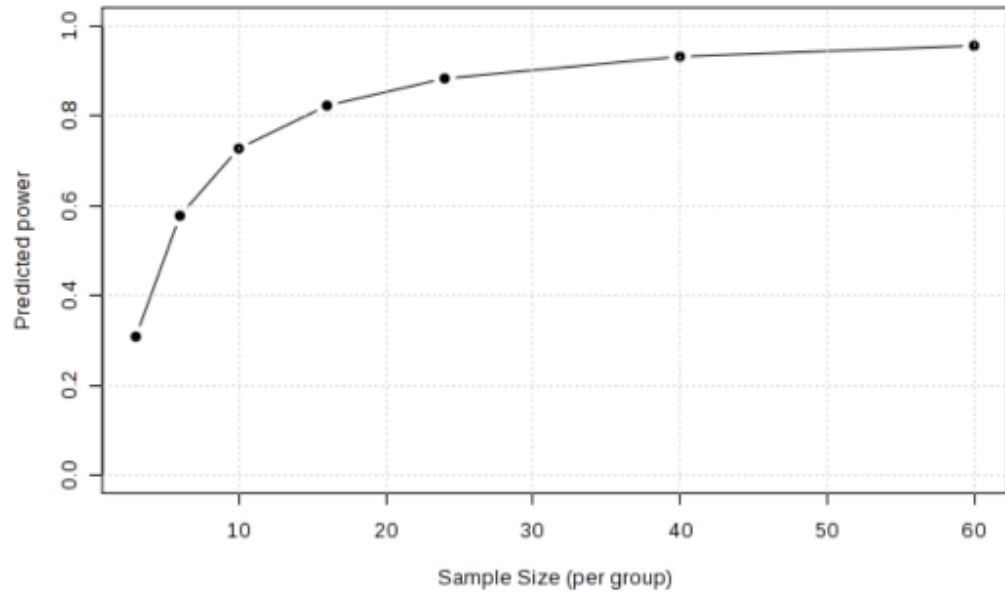**B**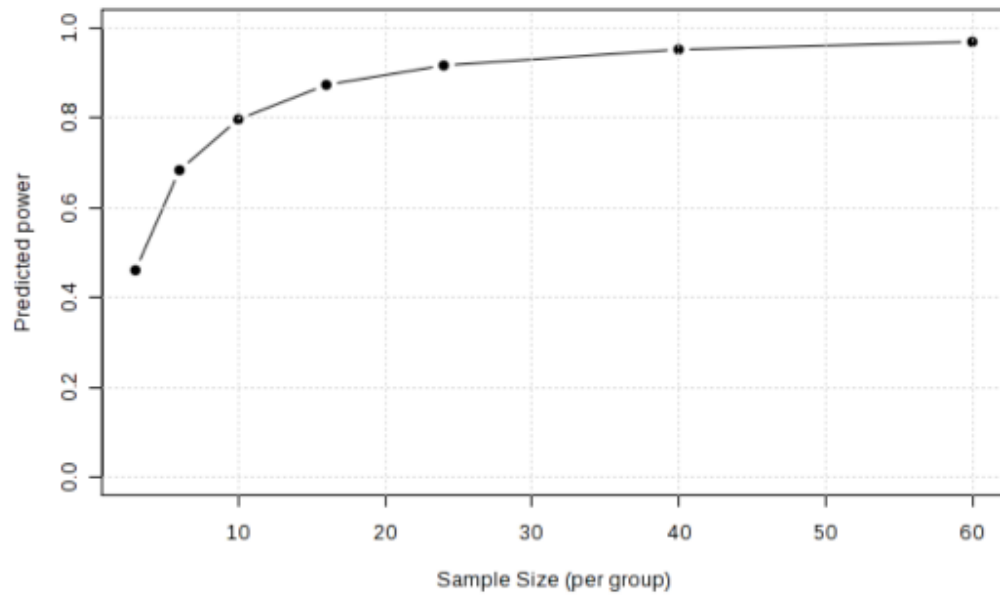

**Figure S5.** Power analysis curves for (A) BAA and (B) BAQ treatments with sample size on x-axis and estimated power using 5% FDR on the y-axis.

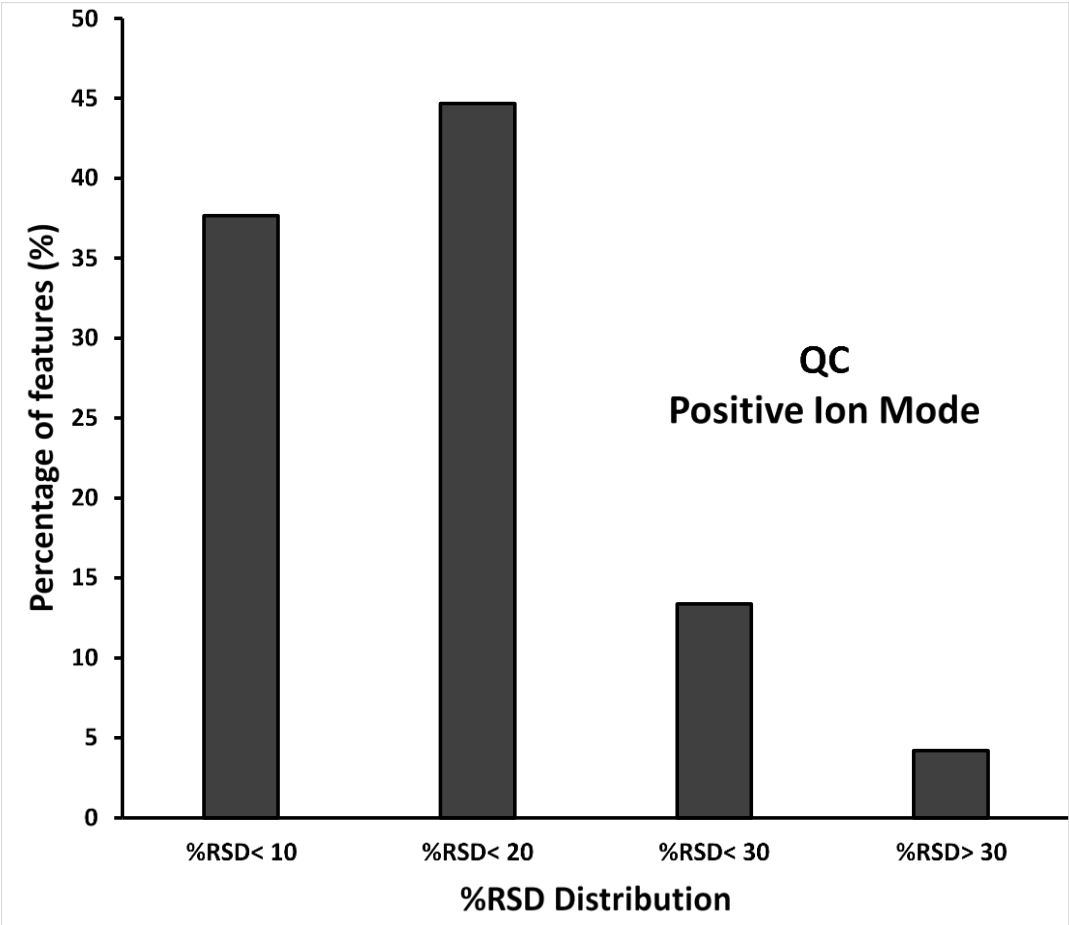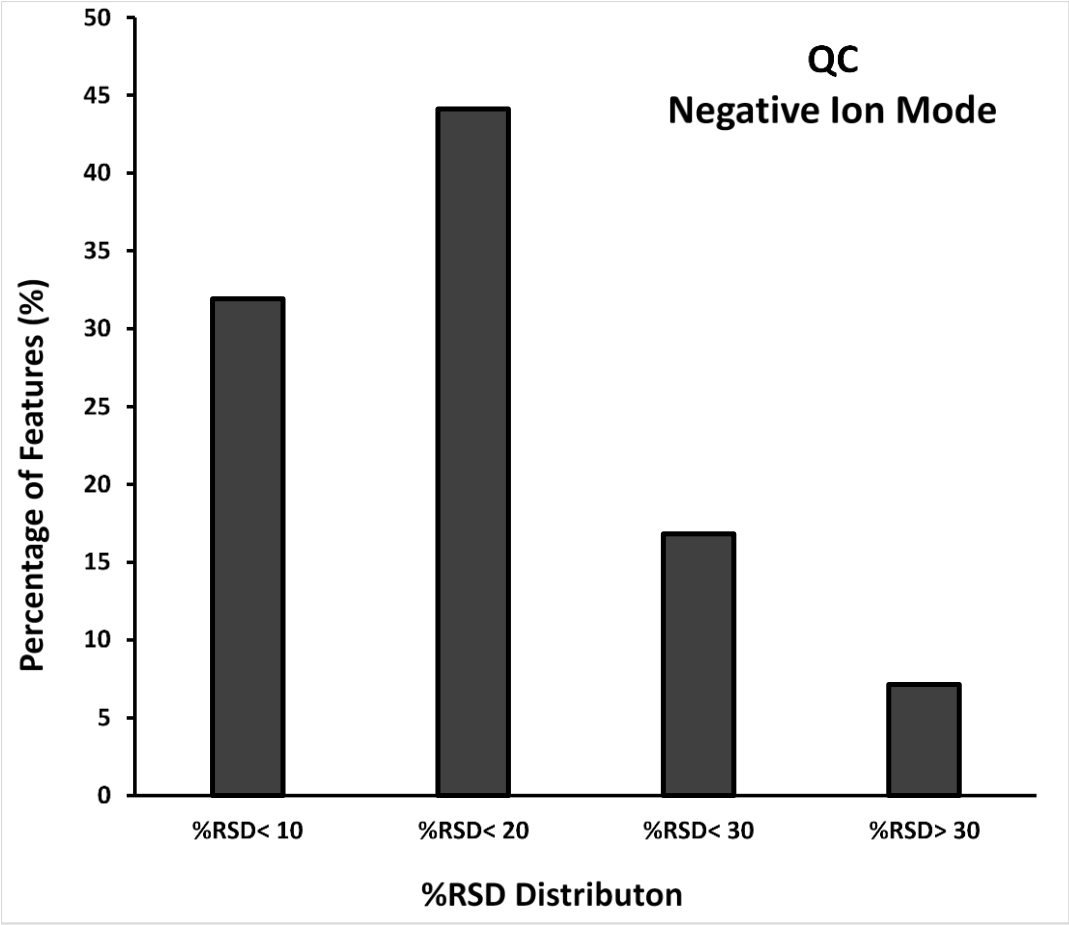

Figure S6.

Scores for PC1 (33.3 %) versus PC2 (15.1 %), Pareto

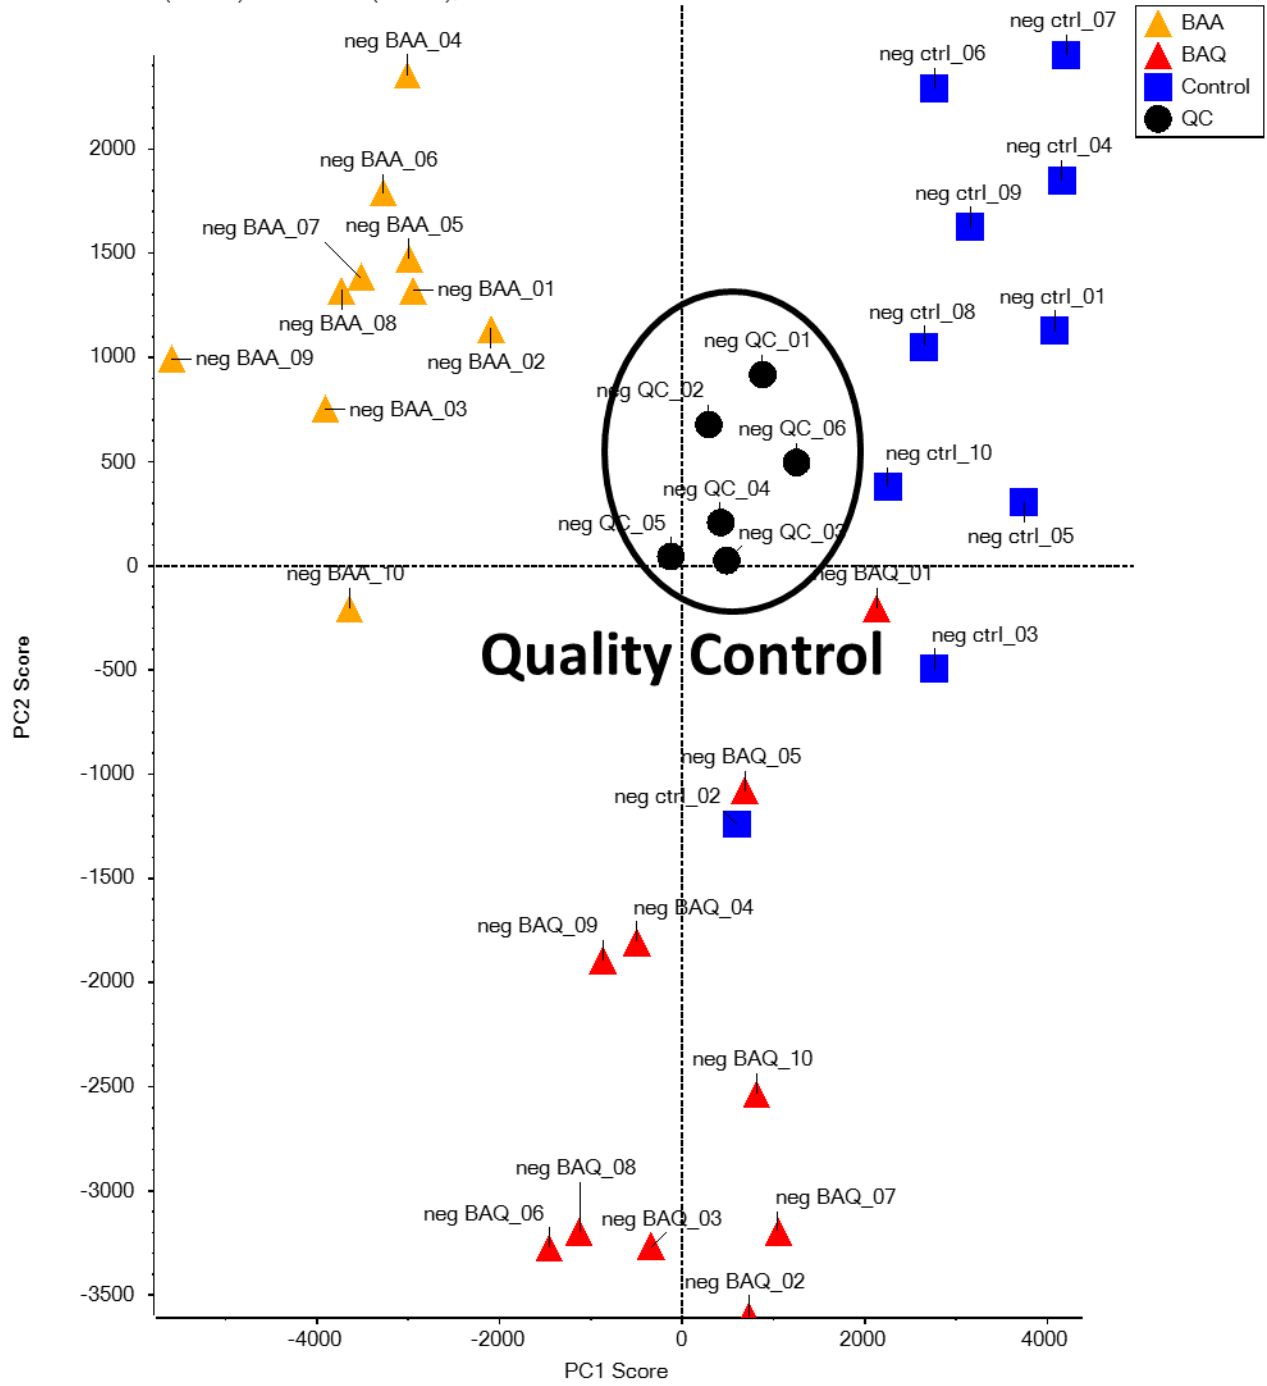

**Figure S7.** PCA scores plot showing tight clustering of quality control (QC) samples.



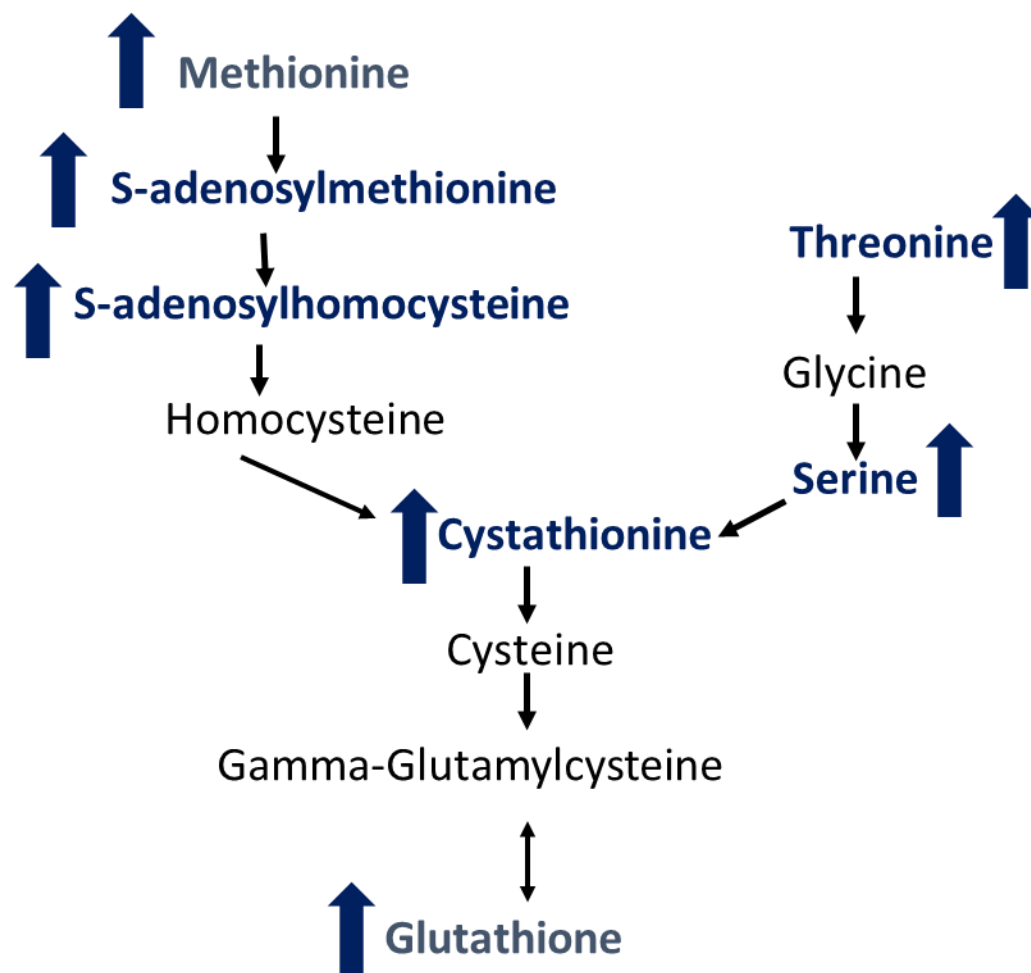

**Figure S8.** Metabolic scheme related to BAQ influence on glutathione metabolism. Compounds marked in blue represent significant up-regulation.

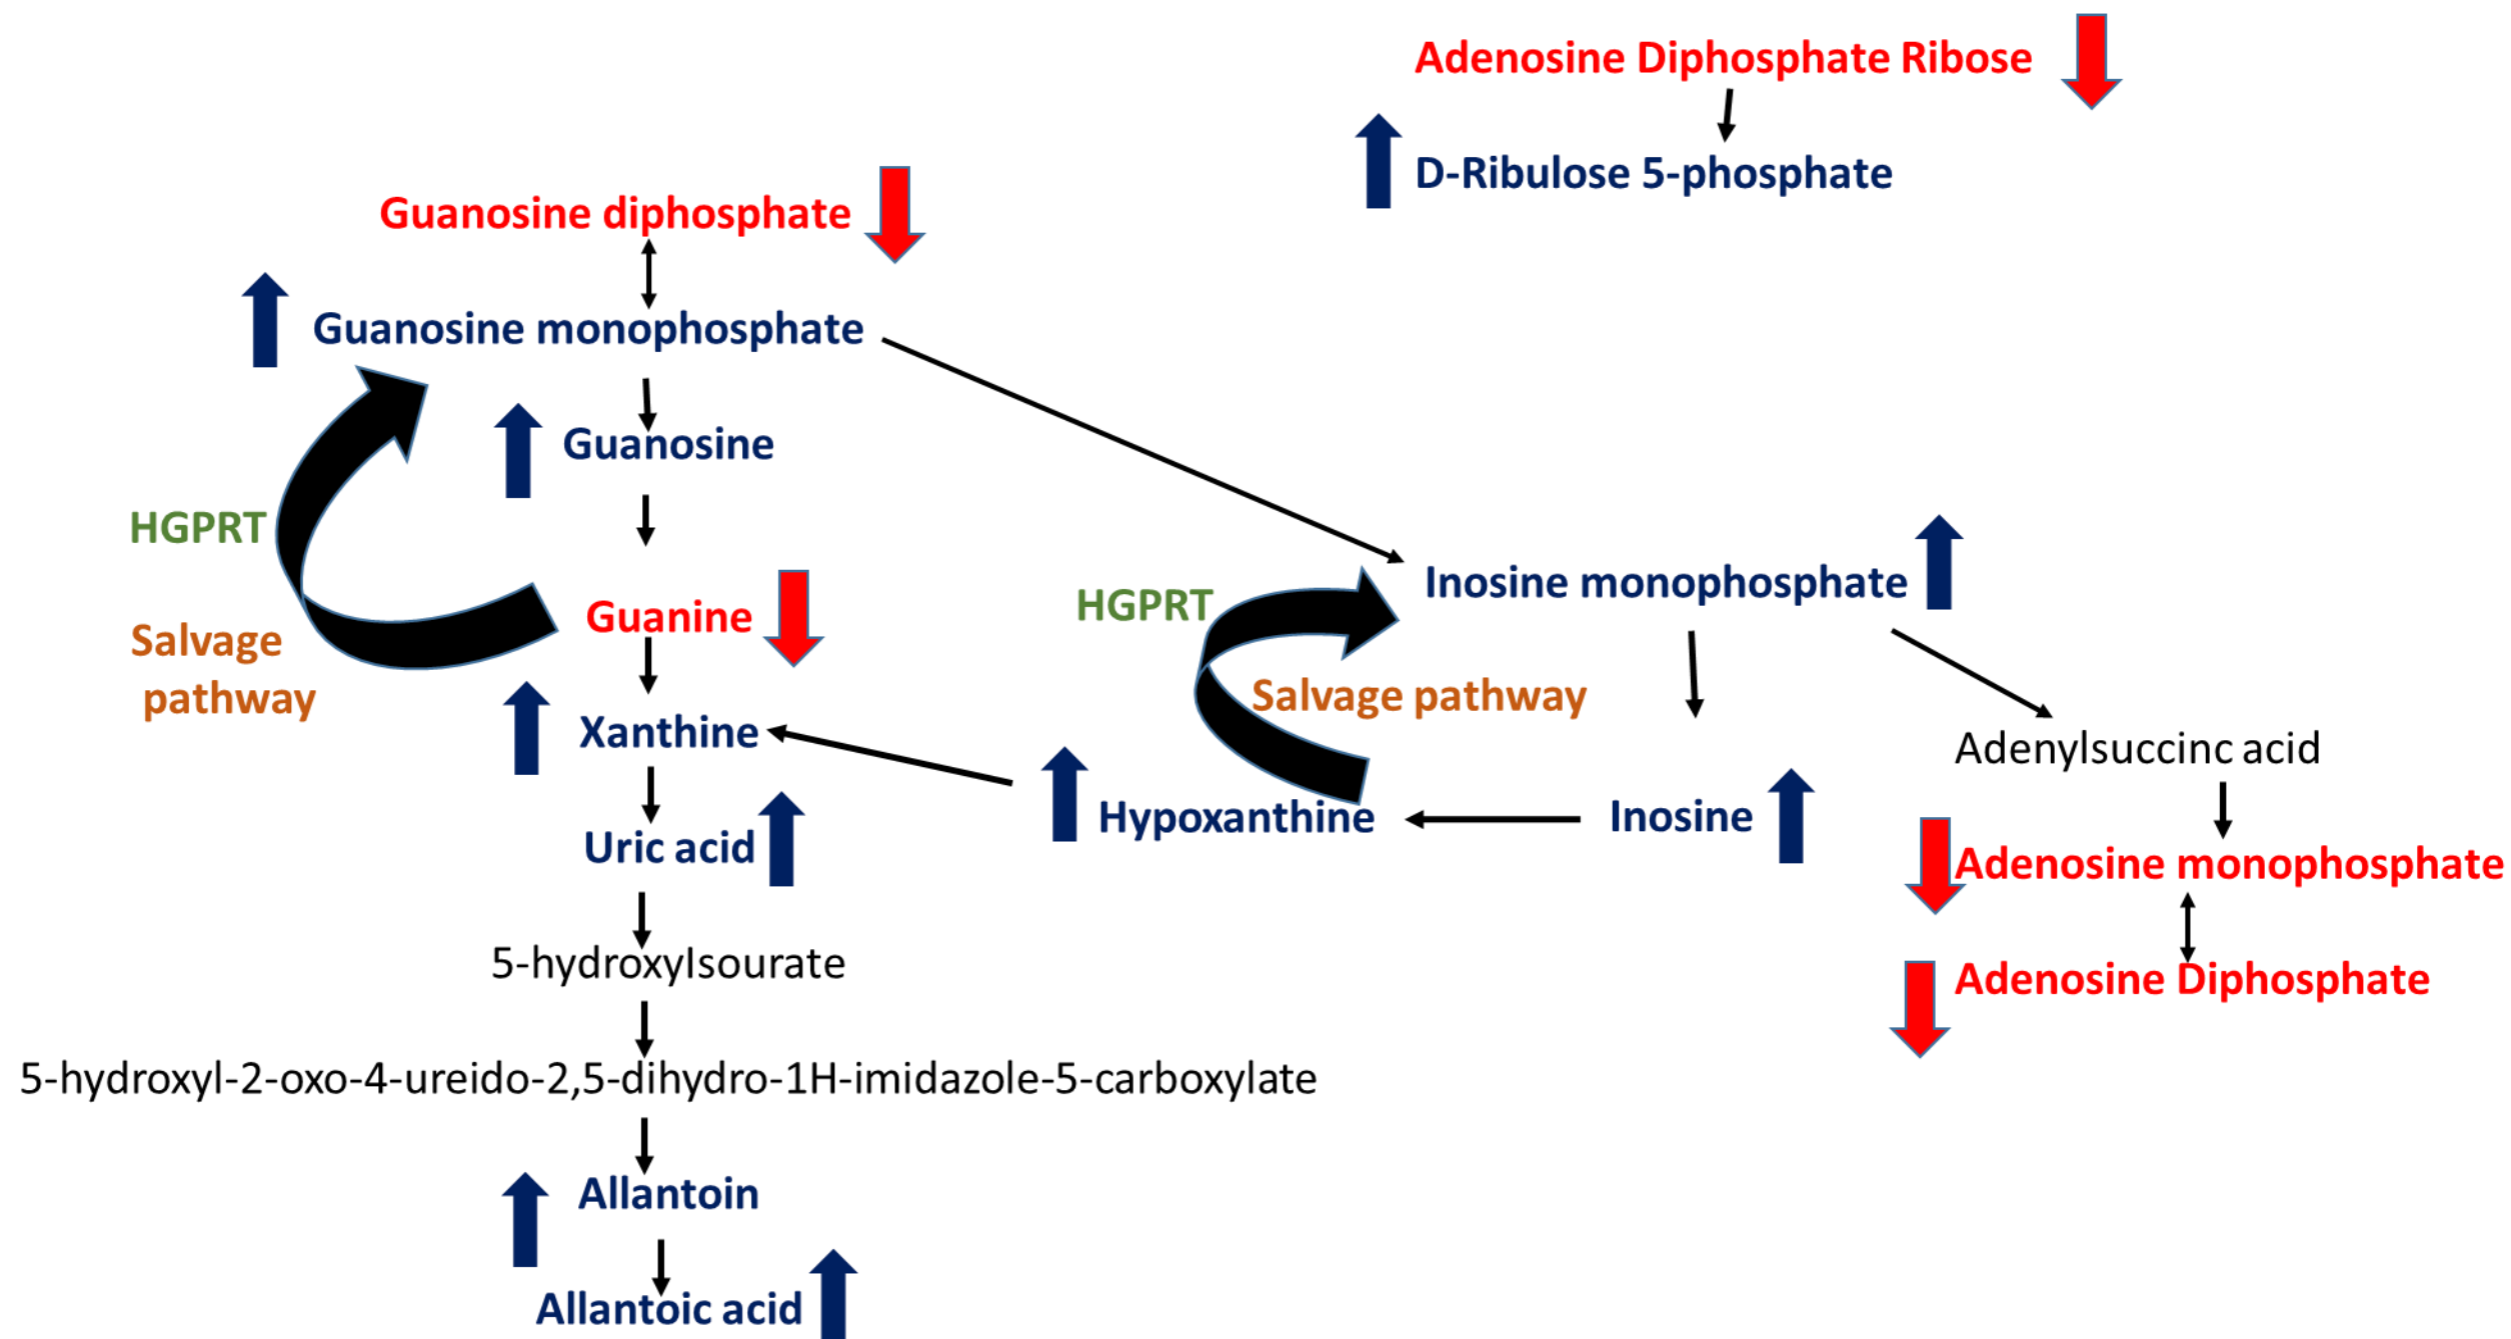

**Figure S9.** Metabolic diagram related to BAA influence on the purine metabolism. Compounds marked in red and blue represent significant down-regulation and up-regulation, respectively. Reactions shown with curved arrows represent the salvage pathways in which purine bases can be reutilized. HGPRT, hypoxanthine-guanine phosphoribosyltransferase enzymes.

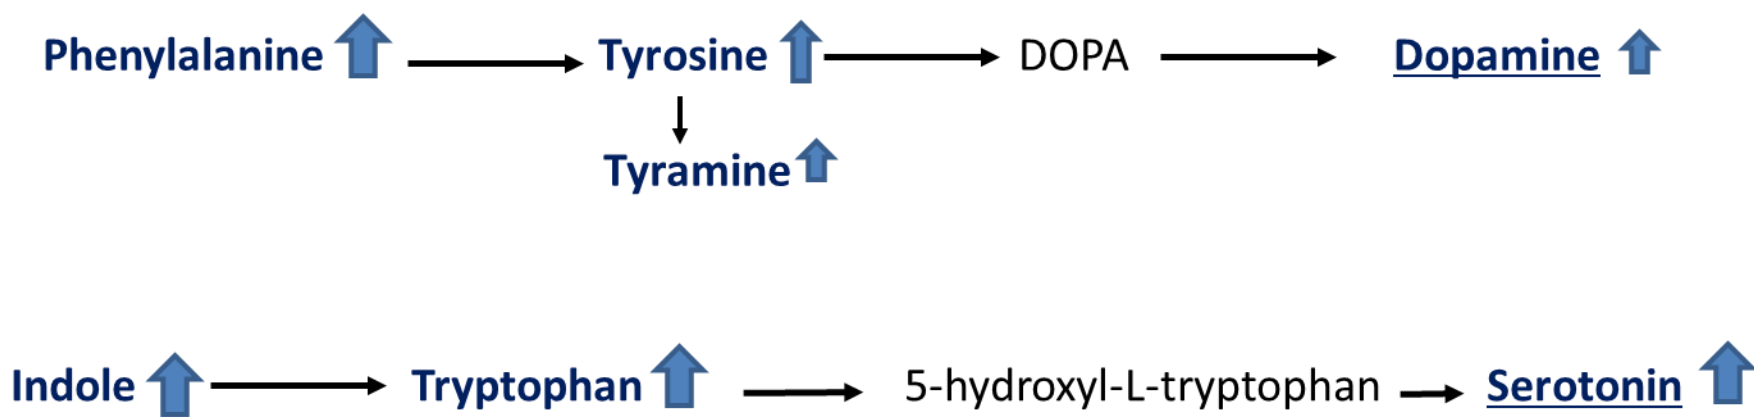

**Figure S10.** Metabolic diagram illustrating the influence of BAA and BAQ exposures on the phenylalanine, tyrosine and tryptophan metabolism. Compounds marked in blue represent significant up-regulation.

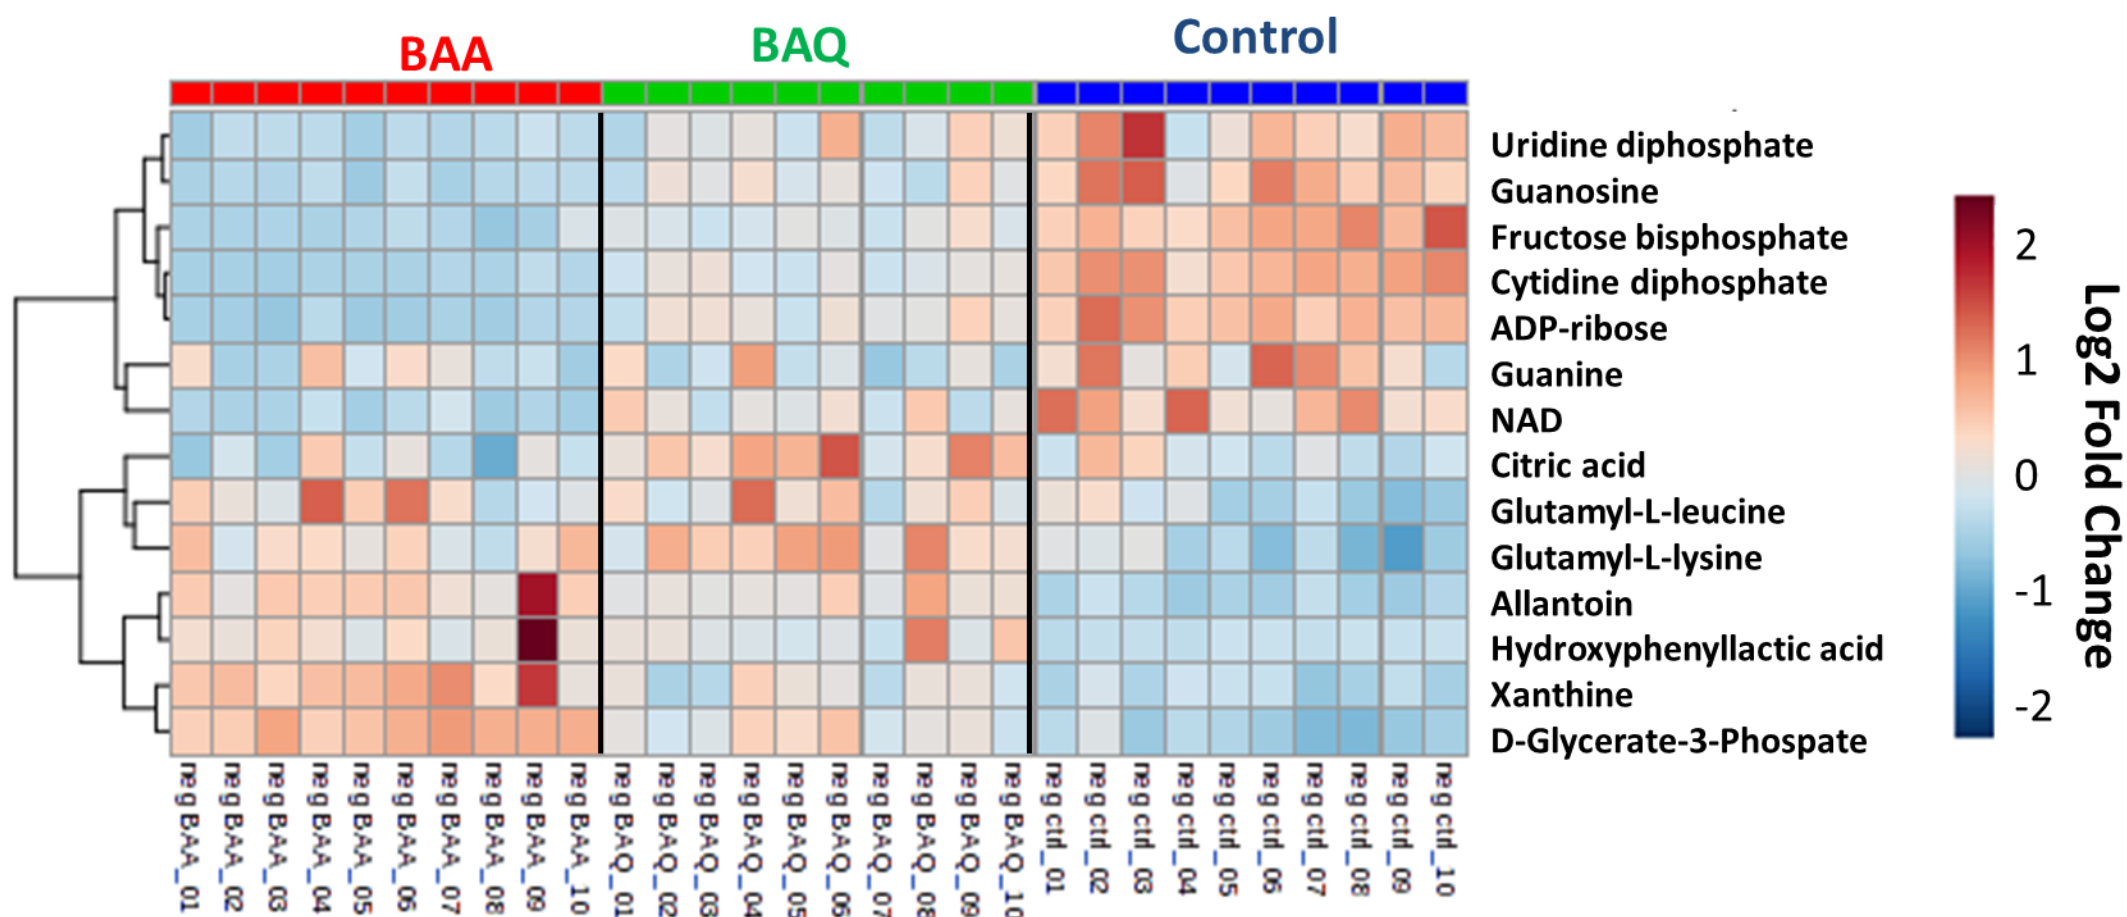

**Figure S11.** Heat map produced by hierarchical clustering of the most significantly different metabolites obtained from the negative ion mode. The log<sub>2</sub> fold change in metabolite levels is color-coded: red pixels denote up regulation; blue pixels denote down regulation. Fold changes were based on peak intensities and relative to a pooled average sample from the control group.

**Table S2.** Percentage of features in which normality, homogeneity of variance or both assumptions are met <sup>a</sup>.

| Mode     | Number of Features | Groups  | Normality<br>(Shapiro-Wilk's test) <sup>b</sup> | Homogeneity of<br>Variance<br>(Levene's test) <sup>c</sup> | Normality &<br>Homogeneity |
|----------|--------------------|---------|-------------------------------------------------|------------------------------------------------------------|----------------------------|
| Positive | 1285               | BAA     | 87%                                             | 80%                                                        | 69%                        |
|          |                    | Control | 91%                                             |                                                            | 72%                        |
| Positive | 1285               | BAQ     | 85%                                             | 79%                                                        | 67%                        |
|          |                    | Control | 91%                                             |                                                            | 72%                        |
| Negative | 1832               | BAA     | 87%                                             | 78%                                                        | 67%                        |
|          |                    | Control | 83%                                             |                                                            | 64%                        |
| Negative | 1832               | BAQ     | 89%                                             | 85%                                                        | 76%                        |
|          |                    | Control | 83%                                             |                                                            | 71%                        |

<sup>a</sup> Percentages represent those features, out of the total, in which there was not enough evidence to reject the null hypothesis ( $H_0$ ) at conventional  $\alpha = 0.05$ .

<sup>b</sup>  $H_0$  = Data are sampled from a Gaussian or normal distribution (Shapiro-Wilk's test).

<sup>c</sup>  $H_0$  = Within-group variances are equal (Levene's test).

**Table S3.** List of identified and significant metabolites ( $p < 0.05$ )<sup>a</sup>

| Mode | m/z                   | RT<br>(min) | Compound                             | <i>BAA vs Control</i>    |                    |                          | <i>BAO vs Control</i>   |                    |                         | Trend |
|------|-----------------------|-------------|--------------------------------------|--------------------------|--------------------|--------------------------|-------------------------|--------------------|-------------------------|-------|
|      |                       |             |                                      | P-value                  | Ratio <sup>b</sup> | FDR                      | P-value                 | Ratio <sup>b</sup> | FDR                     |       |
| POS  | 104.1068              | 5.32        | Choline                              | 6.43 x 10 <sup>-4</sup>  | 1.5                | 1.78 x 10 <sup>-3</sup>  | --                      | -- <sup>c</sup>    | --                      | ↑     |
| POS  | 112.0504              | 5.07        | Cytosine <sup>e</sup>                | 2.61 x 10 <sup>-6</sup>  | 2.1                | 3.59 x 10 <sup>-5</sup>  | --                      | -- <sup>c</sup>    | --                      | ↑     |
| POS  | 116.0705              | 5.27        | Proline <sup>e</sup>                 | 2.16 x 10 <sup>-4</sup>  | 1.8                | 9.34 x 10 <sup>-4</sup>  | 2.33 x 10 <sup>-3</sup> | 1.51               | 7.83 x 10 <sup>-3</sup> | ↑     |
| POS  | 118.0641              | 11.99       | Indole                               | 1.81 x 10 <sup>-5</sup>  | 1.9                | 1.5 x 10 <sup>-4</sup>   | 9.83 x 10 <sup>-4</sup> | 1.62               | 4.28 x 10 <sup>-3</sup> | ↑     |
| POS  | 118.0864              | 5.85        | Betaine <sup>e</sup>                 | 2.07 x 10 <sup>-3</sup>  | 1.5                | 4.6 x 10 <sup>-3</sup>   | --                      | -- <sup>c</sup>    | --                      | ↑     |
| POS  | 120.0646              | 4.5         | Threonine <sup>e</sup>               | 4.50 x 10 <sup>-7</sup>  | 1.9                | 1.39 x 10 <sup>-5</sup>  | --                      | -- <sup>c</sup>    | --                      | ↑     |
| POS  | 120.0799              | 9.65        | Tyramine                             | 7.35 x 10 <sup>-5</sup>  | 2.2                | 4.13 x 10 <sup>-3</sup>  | 9.30 x 10 <sup>-4</sup> | 1.51               | 4.17 x 10 <sup>-3</sup> | ↑     |
| POS  | 123.0555              | 10.05       | Niacinamide <sup>e</sup>             | 1.51 x 10 <sup>-6</sup>  | 2.1                | 2.99 x 10 <sup>-5</sup>  | 1.08 x 10 <sup>-2</sup> | 1.53               | 2.68 x 10 <sup>-2</sup> | ↑     |
| POS  | 130.0493              | 8.24        | 5-Oxoproline <sup>e</sup>            | 7.57 x 10 <sup>-3</sup>  | 1.42               | 1.47 x 10 <sup>-2</sup>  | --                      | -- <sup>c</sup>    | --                      | ↑     |
| POS  | 130.0851              | 4.03        | Pipecolic acid                       | 3.60 x 10 <sup>-4</sup>  | 2.33               | 1.27 x 10 <sup>-3</sup>  | 8.35 x 10 <sup>-4</sup> | 1.74               | 3.94 x 10 <sup>-3</sup> | ↑     |
| POS  | 132.1014              | 6.70        | Isoleucine <sup>e</sup>              | 3.50 x 10 <sup>-4</sup>  | 1.6                | 1.24 x 10 <sup>-3</sup>  | --                      | -- <sup>c</sup>    | --                      | ↑     |
| POS  | 136.0752 <sup>d</sup> | 5.85        | Dopamine                             | 1.64 x 10 <sup>-7</sup>  | 2.12               | 7.02 x 10 <sup>-6</sup>  | 6.73 x 10 <sup>-3</sup> | 1.70               | 9.80 x 10 <sup>-3</sup> | ↑     |
| POS  | 137.0454              |             | Hypoxanthine <sup>e</sup>            | 1.10 x 10 <sup>-6</sup>  | 2.92               | 2.40 x 10 <sup>-5</sup>  | 9.50 x 10 <sup>-4</sup> | 1.70               | 4.22 x 10 <sup>-3</sup> | ↑     |
| POS  | 147.043 <sup>d</sup>  | 5.87        | p-Coumaric acid                      | 2.80 x 10 <sup>-7</sup>  | 2.2                | 9.40 x 10 <sup>-7</sup>  | 1.01 x 10 <sup>-2</sup> | 1.70               | 2.51 x 10 <sup>-2</sup> | ↑     |
| POS  | 147.1131              | 4.00        | Lysine <sup>e</sup>                  | 6.20 x 10 <sup>-4</sup>  | 2.4                | 1.74 x 10 <sup>-3</sup>  | 6.43 x 10 <sup>-4</sup> | 1.80               | 3.43 x 10 <sup>-3</sup> | ↑     |
| POS  | 150.0587              | 5.73        | Methionine <sup>e</sup>              | 3.82 x 10 <sup>-5</sup>  | 2.3                | 2.50 x 10 <sup>-4</sup>  | 5.72 x 10 <sup>-4</sup> | 1.80               | 3.21 x 10 <sup>-3</sup> | ↑     |
| POS  | 159.0913 <sup>d</sup> | 12.07       | Serotonin                            | 6.70 x 10 <sup>-3</sup>  | 1.97               | 7.48 x 10 <sup>-5</sup>  | 9.60 x 10 <sup>-4</sup> | 1.70               | 4.24 x 10 <sup>-3</sup> | ↑     |
| POS  | 165.0540              | 5.85        | 2-Hydroxycinnamic acid               | 5.27 x 10 <sup>-8</sup>  | 2.24               | 3.67 x 10 <sup>-6</sup>  | 7.29 x 10 <sup>-4</sup> | 1.73               | 1.91 x 10 <sup>-3</sup> | ↑     |
| POS  | 166.0869              | 9.70        | Phenylalanine <sup>e</sup>           | 4.30 x 10 <sup>-5</sup>  | 2.2                | 2.74 x 10 <sup>-3</sup>  | 4.08 x 10 <sup>-4</sup> | 1.53               | 2.76 x 10 <sup>-3</sup> | ↑     |
| POS  | 175.119               | 4.26        | Arginine <sup>e</sup>                | 1.47 x 10 <sup>-6</sup>  | 2.1                | 2.97 x 10 <sup>-5</sup>  | 1.56 x 10 <sup>-4</sup> | 1.70               | 1.46 x 10 <sup>-3</sup> | ↑     |
| POS  | 177.0619              | 4.82        | Allantoic acid                       | 2.34 x 10 <sup>-4</sup>  | 1.5                | 9.71 x 10 <sup>-4</sup>  | 2.90 x 10 <sup>-4</sup> | 1.50               | 2.16 x 10 <sup>-3</sup> | ↑     |
| POS  | 182.0811              | 5.87        | Tyrosine <sup>e</sup>                | 1.52 x 10 <sup>-8</sup>  | 2.2                | 1.67 x 10 <sup>-6</sup>  | 4.13 x 10 <sup>-3</sup> | 1.70               | 8.21 x 10 <sup>-3</sup> | ↑     |
| POS  | 184.0726              | 25.26       | Phosphocholine <sup>e</sup>          | 7.92 x 10 <sup>-3</sup>  | 0.695              | 151 x 10 <sup>-2</sup>   | --                      | -- <sup>c</sup>    | --                      | ↓     |
| POS  | 188.0709              | 11.96       | Indolelactic acid                    | 2.65 x 10 <sup>-6</sup>  | 2.04               | 3.59 x 10 <sup>-5</sup>  | 5.04 x 10 <sup>-4</sup> | 1.71               | 3.03 x 10 <sup>-3</sup> | ↑     |
| POS  | 203.1519              | 5.13        | Dimethyl-L-arginine                  | 1.60 x 10 <sup>-3</sup>  | 2.02               | 3.70 x 10 <sup>-3</sup>  | --                      | -- <sup>c</sup>    | --                      | ↑     |
| POS  | 205.0980              | 12.01       | Tryptophan <sup>e</sup>              | 1.79 x 10 <sup>-6</sup>  | 2.11               | 3.15 x 10 <sup>-5</sup>  | 2.55 x 10 <sup>-4</sup> | 1.76               | 2.06 x 10 <sup>-3</sup> | ↑     |
| POS  | 212.0433              | 4.9         | Phosphocreatine <sup>e</sup>         | 7.10 x 10 <sup>-5</sup>  | 0.35               | 4.02 x 10 <sup>-4</sup>  | 2.41 x 10 <sup>-4</sup> | 0.46               | 1.98 x 10 <sup>-3</sup> | ↓     |
| POS  | 218.140               | 11.18       | Propionylcarnitine                   | 2.33 x 10 <sup>-5</sup>  | 1.90               | 1.80 x 10 <sup>-4</sup>  | 2.70 x 10 <sup>-5</sup> | 2.03               | 4.16 x 10 <sup>-4</sup> | ↑     |
| POS  | 219.0984              | 4.77        | 5-L-glutamyl-L-alanine               | 1.83 x 10 <sup>-3</sup>  | 2.3                | 4.20 x 10 <sup>-3</sup>  | 6.34 x 10 <sup>-7</sup> | 2.60               | 3.05 x 10 <sup>-5</sup> | ↑     |
| POS  | 223.0749              | 4.25        | Cystathionine <sup>e</sup>           | 3.02 x 10 <sup>-5</sup>  | 1.64               | 2.13 x 10 <sup>-4</sup>  | 3.00 x 10 <sup>-4</sup> | 1.50               | 2.23 x 10 <sup>-3</sup> | ↑     |
| POS  | 244.0941              | 5.10        | Cytidine <sup>e</sup>                | 2.65 x 10 <sup>-6</sup>  | 2.43               | 3.59 x 10 <sup>-5</sup>  | --                      | -- <sup>c</sup>    | --                      | ↑     |
| POS  | 249.1082              |             | L-Threoninyl-L-Glutamate             | 5.16 x 10 <sup>-4</sup>  | 2.39               | 1.52 x 10 <sup>-3</sup>  | 7.38 x 10 <sup>-8</sup> | 2.57               | 6.15 x 10 <sup>-6</sup> | ↑     |
| POS  | 269.0873              | 8.36        | Inosine <sup>e</sup>                 | 3.14 x 10 <sup>-6</sup>  | 3.80               | 4.09 x 10 <sup>-5</sup>  | 5.08 x 10 <sup>-4</sup> | 1.82               | 3.03 x 10 <sup>-3</sup> | ↑     |
| POS  | 308.0910              | 5.35        | Glutathione <sup>e</sup>             | 2.02 x 10 <sup>-2</sup>  | 1.46               | 3.43 x 10 <sup>-2</sup>  | 1.34 x 10 <sup>-2</sup> | 1.50               | 3.21 x 10 <sup>-2</sup> | ↑     |
| POS  | 329.2458              | 26.32       | Docosahexaenoic acid <sup>e</sup>    | 1.25 x 10 <sup>-3</sup>  | 0.52               | 3.12 x 10 <sup>-3</sup>  | 2.81 x 10 <sup>-3</sup> | 0.58               | 5.94 x 10 <sup>-3</sup> | ↓     |
| POS  | 349.0534              | 5.76        | Inosine monophosphate <sup>e</sup>   | 4.10 x 10 <sup>-3</sup>  | 2.56               | 8.38 x 10 <sup>-3</sup>  | --                      | -- <sup>c</sup>    | --                      | ↑     |
| POS  | 364.0674              | 5.24        | Guanosine monophosphate <sup>e</sup> | 7.02 x 10 <sup>-5</sup>  | 1.76               | 4.01 x 10 <sup>-4</sup>  | 1.39 x 10 <sup>-3</sup> | 1.53               | 5.25 x 10 <sup>-3</sup> | ↑     |
| POS  | 385.1298              | 8.56        | S-adenosylhomocysteine <sup>e</sup>  | 1.46 x 10 <sup>-5</sup>  | 2.3                | 1.26 x 10 <sup>-4</sup>  | 2.46 x 10 <sup>-6</sup> | 1.92               | 8.24 x 10 <sup>-5</sup> | ↑     |
| POS  | 399.1437              | 5.00        | S-adenosymethionine                  | --                       | -- <sup>c</sup>    | --                       | 3.23 x 10 <sup>-3</sup> | 1.63               | 7.01 x 10 <sup>-3</sup> | ↑     |
| POS  | 428.0376              | 4.85        | Adenosine diphosphate <sup>e</sup>   | 6.60 x 10 <sup>-4</sup>  | 0.48               | 1.82 x 10 <sup>-3</sup>  | 3.41 x 10 <sup>-2</sup> | 0.72               | 4.69 x 10 <sup>-2</sup> | ↓     |
| NEG  | 104.377               | 4.38        | Serine <sup>e</sup>                  | 6.40 x 10 <sup>-7</sup>  | 1.7                | 3.33 x 10 <sup>-6</sup>  | 6.08 x 10 <sup>-3</sup> | 1.33               | 9.60 x 10 <sup>-3</sup> | ↑     |
| NEG  | 150.0423              | 6.74        | Guanine <sup>e</sup>                 | 2.10 x 10 <sup>-2</sup>  | 0.71               | 2.90 x 10 <sup>-2</sup>  | 2.32 x 10 <sup>-2</sup> | 0.70               | 4.83 x 10 <sup>-2</sup> | ↓     |
| NEG  | 151.0266              | 8.73        | Xanthine <sup>e</sup>                | 1.39 x 10 <sup>-6</sup>  | 2.3                | 6.62 x 10 <sup>-6</sup>  | 7.90 x 10 <sup>-3</sup> | 1.4                | 1.98 x 10 <sup>-2</sup> | ↑     |
| NEG  | 157.0384              | 4.98        | Allantoin <sup>e</sup>               | 3.46 x 10 <sup>-5</sup>  | 2.3                | 1.10 x 10 <sup>-4</sup>  | 3.77 x 10 <sup>-6</sup> | 1.87               | 3.54 x 10 <sup>-5</sup> | ↑     |
| NEG  | 166.9761              | 4.62        | Phosphoenol pyruvate <sup>e</sup>    | 4.21 x 10 <sup>-11</sup> | 2.04               | 9.85 x 10 <sup>-10</sup> | --                      | -- <sup>c</sup>    | --                      | ↑     |
| NEG  | 167.022               | 6.34        | Uric acid <sup>e</sup>               | 3.53 x 10 <sup>-2</sup>  | 1.30               | 4.55 x 10 <sup>-2</sup>  | --                      | -- <sup>c</sup>    | --                      | ↑     |

|     |           |       |                                              |                        |                 |                        |                       |                 |                       |   |
|-----|-----------|-------|----------------------------------------------|------------------------|-----------------|------------------------|-----------------------|-----------------|-----------------------|---|
| NEG | 181.05191 | 12.42 | Hydroxyphenyllactic acid <sup>e</sup>        | $1.11 \times 10^{-2}$  | 3.12            | $1.78 \times 10^{-2}$  | $7.17 \times 10^{-3}$ | 2.32            | $1.84 \times 10^{-2}$ | ↑ |
| NEG | 184.9865  | 4.39  | D-glycerate-3-phosphate                      | $1.56 \times 10^{-10}$ | 2.03            | $2.67 \times 10^{-9}$  | $2.78 \times 10^{-5}$ | 1.52            | $1.96 \times 10^{-4}$ | ↑ |
| NEG | 191.0208  | 5.51  | Citric acid <sup>e</sup>                     | --                     | -- <sup>c</sup> | --                     | $3.00 \times 10^{-3}$ | 1.43            | $8.76 \times 10^{-3}$ | ↑ |
| NEG | 229.011   | 4.34  | D-ribose-5-phosphate <sup>e</sup>            | $2.23 \times 10^{-11}$ | 2.04            | $6.80 \times 10^{-10}$ | --                    | -- <sup>c</sup> | --                    | ↑ |
| NEG | 243.0616  | 6.89  | Uridine <sup>e</sup>                         | $6.18 \times 10^{-3}$  | 1.47            | $9.93 \times 10^{-3}$  | --                    | -- <sup>c</sup> | --                    | ↑ |
| NEG | 259.1320  | 6.64  | L-gamma-glutamyl-L-leucine                   | $7.70 \times 10^{-3}$  | 2.12            | $1.20 \times 10^{-2}$  | $9.36 \times 10^{-3}$ | 1.95            | $2.24 \times 10^{-2}$ | ↑ |
| NEG | 274.1413  | 3.98  | E-(gamma-glutamyl)-lysine                    | $5.10 \times 10^{-4}$  | 1.63            | $1.07 \times 10^{-3}$  | $4.43 \times 10^{-5}$ | 1.90            | $2.77 \times 10^{-4}$ | ↑ |
| NEG | 275.0169  | 4.31  | 6-phosphogluconic acid                       | $3.40 \times 10^{-3}$  | 1.55            | $5.81 \times 10^{-3}$  | --                    | -- <sup>c</sup> | --                    | ↑ |
| NEG | 282.0856  | 8.12  | Guanosine <sup>e</sup>                       | $3.50 \times 10^{-3}$  | 1.53            | $5.92 \times 10^{-3}$  | --                    | -- <sup>c</sup> | --                    | ↑ |
| NEG | 338.9882  | 4.6   | D-fructose 1,6-bisphosphate <sup>e</sup>     | $4.44 \times 10^{-6}$  | 0.34            | $1.76 \times 10^{-5}$  | $9.85 \times 10^{-4}$ | 0.50            | $3.47 \times 10^{-3}$ | ↓ |
| NEG | 346.053   | 5.29  | Adenosine monophosphate <sup>e</sup>         | $4.26 \times 10^{-7}$  | 0.28            | $2.40 \times 10^{-6}$  | --                    | -- <sup>c</sup> | --                    | ↓ |
| NEG | 402.0071  | 4.39  | Cytidine diphosphate <sup>e</sup>            | $4.90 \times 10^{-11}$ | 0.26            | $1.10 \times 10^{-9}$  | $1.43 \times 10^{-7}$ | 0.51            | $1.96 \times 10^{-6}$ | ↓ |
| NEG | 402.9948  | 4.40  | Uridine diphosphate <sup>e</sup>             | $2.70 \times 10^{-5}$  | 0.47            | $8.56 \times 10^{-5}$  | $1.40 \times 10^{-2}$ | 0.69            | $3.16 \times 10^{-2}$ | ↓ |
| NEG | 410.2226  | 23.87 | N-arachidonoyl taurine                       | --                     | -- <sup>c</sup> | --                     | $2.71 \times 10^{-5}$ | 2.10            | $1.93 \times 10^{-4}$ | ↑ |
| NEG | 442.0132  | 5.11  | Guanosine 5'diphosphate                      | $6.98 \times 10^{-7}$  | 0.41            | $3.60 \times 10^{-6}$  | $5.30 \times 10^{-4}$ | 0.63            | $2.06 \times 10^{-3}$ | ↓ |
| NEG | 558.0631  | 4.79  | Adenosine diphosphate ribose <sup>e</sup>    | $6.32 \times 10^{-11}$ | 0.21            | $1.26 \times 10^{-9}$  | $1.15 \times 10^{-5}$ | 0.58            | $8.92 \times 10^{-5}$ | ↓ |
| NEG | 558.0631  | 4.79  | Nucleotide adenine dinucleotide <sup>e</sup> | $3.12 \times 10^{-6}$  | 0.48            | $1.31 \times 10^{-5}$  | $5.10 \times 10^{-3}$ | 0.72            | $1.36 \times 10^{-2}$ | ↓ |

<sup>a</sup> *p* values were obtained from comparing either BAA or BAQ group to the same control group using the Welch *t*-test.

<sup>b</sup> Fold-change value obtained from comparing the average of metabolites in either the BAA or BAQ treatment with the control group.

<sup>c</sup> No significant change when compared to respective controls.

<sup>d</sup> *m/z* value of molecular ion adduct [M+H-H<sub>2</sub>O]<sup>+</sup> in positive ion mode. Metabolite identified by spectral fragmentation pattern.

<sup>e</sup> Metabolite identified by database search and confirmed by authentic standards.
